# Supplementary material for: A General SBML Compatible Hybrid Modeling Framework: Combining Biochemical Mechanisms with Deep Neural Networks for Systems Biology Applications
Source: Preprints.org preprint supplement (doi:10.20944/preprints202301.0579.v1), 2023-01-31
Supplement: Supplementary file 1 [file supplementary]

Synthetic datasets for the 3 case studies**: Simulation_data.xlsx**

Case study 1**:** threonine synthesis model in *E. coli* [1]

- SBML file of original mechanistic model: **chassagnole1.xml**
- SBML file of hybrid mechanistic/FFNN model: **chassagnole1hyb.xml**

Case study 2**:** P58IPK signal transduction pathway [2]

- SBML file of original mechanistic model: **goodman.xml**
- SBML file of hybrid mechanistic/FFNN model: **goodmanhyb.xml**

Case study 2**:** Yeast glycolytic oscillations [3]

- SBML file of original mechanistic model: **dano1.xml**
- SBML file of hybrid mechanistic/FFNN model: **dano1hyb.xml**
